# Supplementary material for: Prediction of second-order nonlinear optical properties of Wells–Dawson polyoxometalate derivatives [X–C(CH2O)3P2M′3M15O59]6−(X = NO2, NH2, and CH3, M′ = V and Nb, M = W and Mo)
Source: Royal Society of Chemistry journal article supplement (doi:10.1039/c3qi00024a), 2013-12-16
Supplement: c3qi00024a.pdf [file c3qi00024a.pdf]

### Supporting information

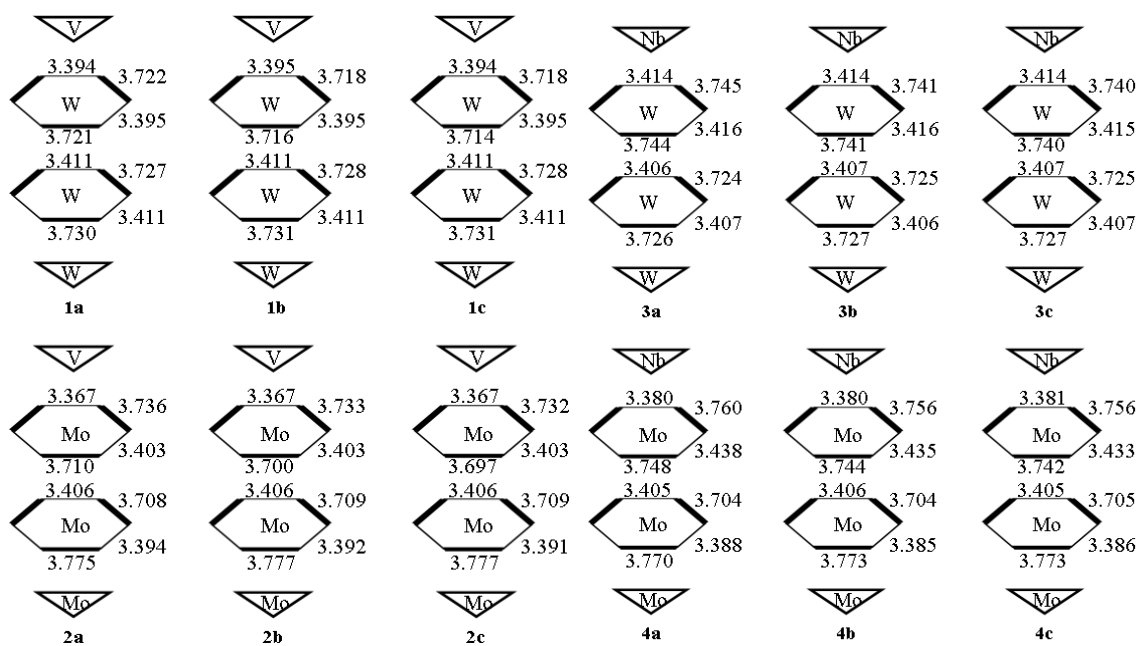

**Figure S1.** Alternation of W-W inside the two Belts of **a**, **b**, **c**, and **d** isomers at the BP86/TZP level

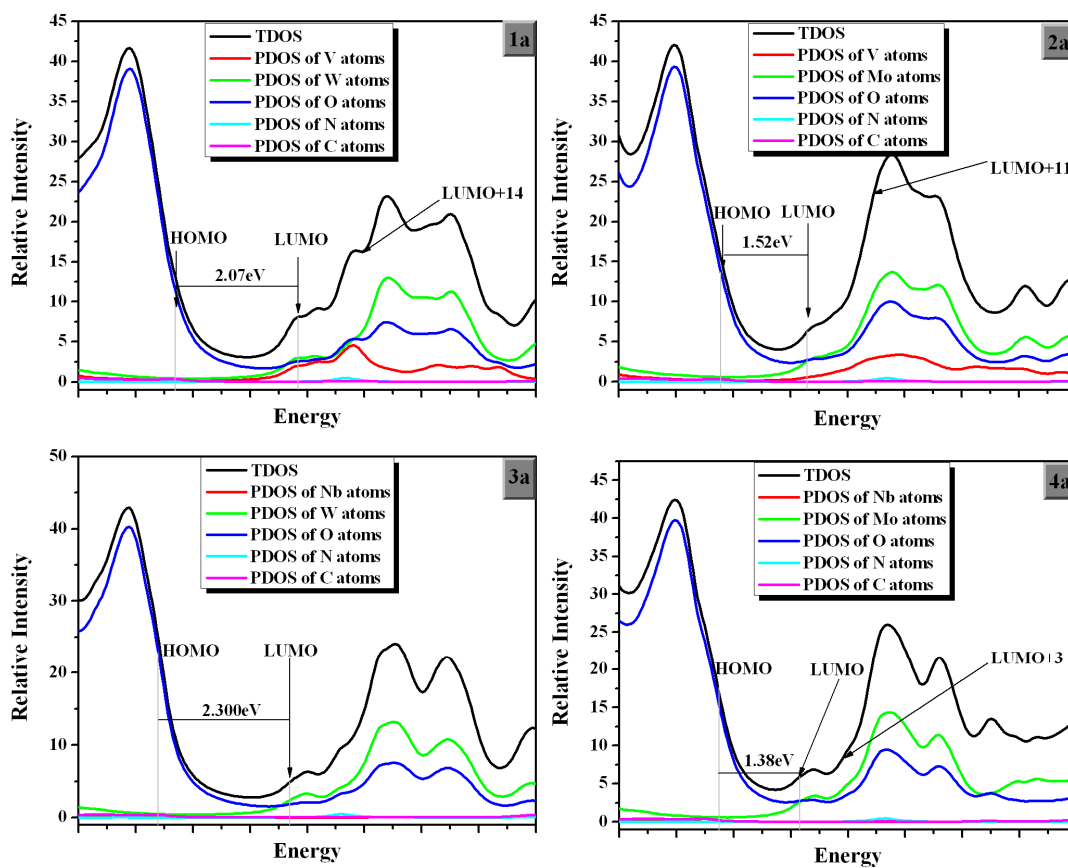

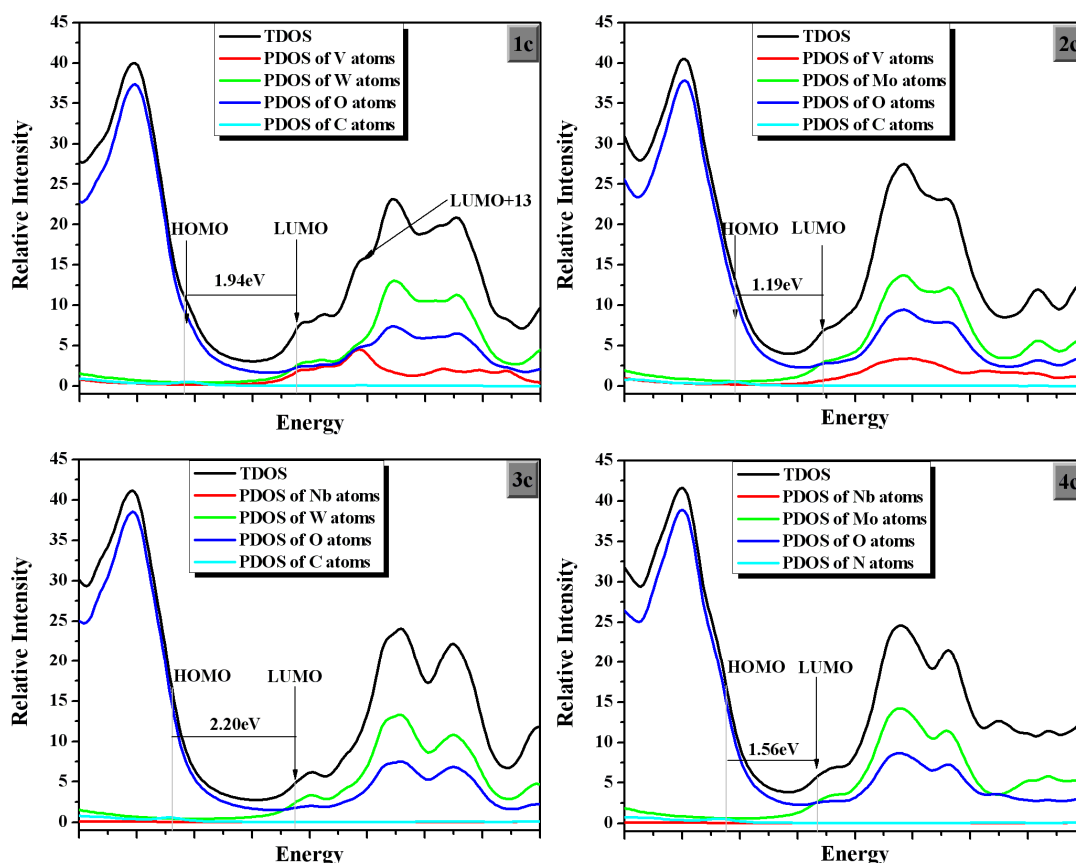

**Figure S2.** Partial Density of State (PDOS) of Series **a** and **c** Compounds

**Table S1.** SAOP/TZP Calculated Excited State Transition Energy ( $\Delta E_{ge}$ , eV), Oscillator Strengths ( $f_{eg}$ ), and Major Assignment of Optical Transitions for Series **a** and **c**

| Systems   | $E_{ge}$ | $f_{eg}$ | Major transition                   |
|-----------|----------|----------|------------------------------------|
| <b>1a</b> | 2.693    | 0.024    | 409a'' $\rightarrow$ 410a'' 56.03% |
|           |          |          | 473a' $\rightarrow$ 474a' 38.81%   |
| <b>1c</b> | 2.422    | 0.021    | 470a' $\rightarrow$ 471a' 47.70%   |
|           |          |          | 405a' $\rightarrow$ 406a' 44.04%   |
| <b>2a</b> | 2.607    | 0.007    | 282a'' $\rightarrow$ 292a'' 61.56% |
|           |          |          | 351a' $\rightarrow$ 353a' 70.84%   |
| <b>2c</b> | 2.389    | 0.010    | 348a' $\rightarrow$ 350a' 94.05%   |
|           |          |          |                                    |
| <b>3a</b> | 3.308    | 0.009    | 421a'' $\rightarrow$ 422a'' 63.92% |
|           |          |          | 486a' $\rightarrow$ 490a' 12.27%   |
| <b>3c</b> | 3.238    | 0.004    | 409a'' $\rightarrow$ 418a'' 56.01% |
|           |          |          | 412a'' $\rightarrow$ 418a'' 35.85% |
| <b>4a</b> | 2.300    | 0.003    | 298a'' $\rightarrow$ 304a'' 76.01% |
|           |          |          | 296a'' $\rightarrow$ 304a'' 21.96% |
|           | 2.372    | 0.003    | 365a' $\rightarrow$ 367a' 63.22%   |
|           |          |          | 296a'' $\rightarrow$ 304a'' 15.81% |
| <b>4c</b> | 2.542    | 0.006    | 302a'' $\rightarrow$ 305a'' 9.46%  |
|           |          |          | 357a'' $\rightarrow$ 300a'' 77.60% |
